# Supplementary material
Source: Springer Nature journal article supplement (https://www.springermedizin.de/resource/supplementary/13223_2014_502_MOESM3_ESM.pdf/9596668)

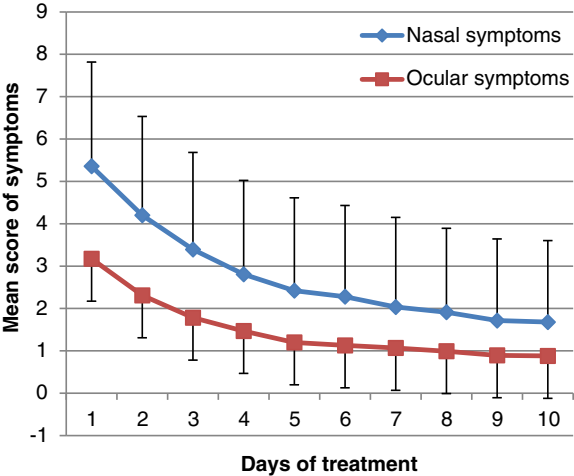

Supplement: MOESM3 [file 9596668]
